# Supplementary material for: A molecular odorant transduction model and the complexity of spatio-temporal encoding in the Drosophila antenna
Source: PLOS journal article supplement (doi:10.1371/journal.pcbi.1007751), 2020-04-14
Supplement: S1 (10.1371/journal.pcbi.1007751.s001) [file journal.pcbi.1007751.s001]

## Appendix

### Peri-receptor processing model

$h(t)$  in Eq (2) is the impulse response of a low-pass linear filter that is usually defined in the literature in frequency domain. Alternatively,  $h(t)$  is the solution to the second-order differential equation,

$$\frac{d^2}{dt^2}h(t) + 2\alpha_1\beta_1\frac{d}{dt}h(t) + \alpha_1^2h(t) = \alpha_1^2\delta(t),$$

with the initial condition  $h(0) = 0$  and  $dh/dt|_{t=0} = 0$ , where  $\delta$  is the Dirac-function. The value of  $\alpha_1$  and  $\beta_1$  are given in Table 2, and the corresponding  $h(t)$  has an effective bandwidth of 45 Hz.

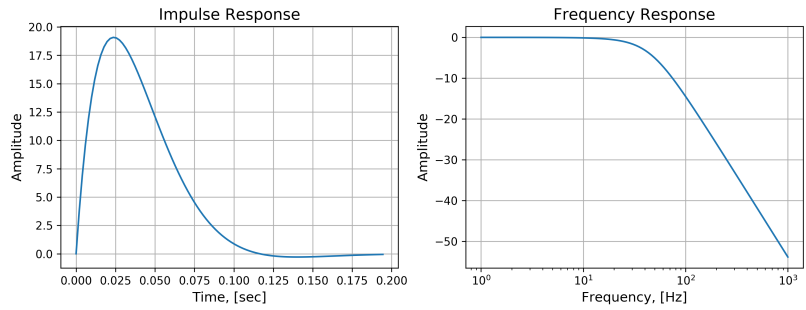

**Fig A1. Impulse Response and the Frequency Response of the Peri-receptor Process.** (left) The impulse response. (right) The frequency response.

### Biophysical spike generator model

We restrict our choice of the spiking mechanism of OSNs to biophysical spike generators (BSG) such as the Hodgkin-Huxley, the Morris-Lecar, and the Connor-Stevens point neuron models. For simplicity of presentation, we only describe here the Connor-Stevens (CS) neuron model [1]. The CS model can be expressed in compact form as

$$\frac{d}{dt}[\mathbf{y}]_{ron} = \mathbf{f}([\mathbf{y}]_{ron}, [\mathbf{I}]_{ron}),$$

with  $\mathbf{y} = [V, n, m, h, p, q]^T$  is a vector of state variables,  $\mathbf{f}$  is a vector function of the same dimension, and  $\mathbf{I}$  is the transduction current generated by the OTP model. Here  $ron$  takes the same values as the same subscript in the OTP model. Compared with the classic Hodgkin-Huxley neuron model, the CS neuron model has a continuous F-I curve [2], and is capable of encoding weak pulse stimuli with low spiking rates. It also has a wide spiking rate range that sufficiently covers the spiking rate range of the OSNs.

The CS neuron model does not fire spontaneously, and requires a minimum value of the input current to trigger firing. OSNs are noisy and fire spontaneously on average 8 spikes/s. To mitigate this mismatch, we added noise to the CS neuron model,

$$d[\mathbf{y}]_{ron} = \mathbf{f}([\mathbf{y}]_{ron}, [\mathbf{I}]_{ron})dt + d[\mathbf{W}]_{ron}, \quad (\text{A1})$$

where  $\mathbf{W} = [0, \sigma W_n, \sigma W_m, \sigma W_h, \sigma W_a, \sigma W_b]^T$ , and  $(W_n, W_m, W_h, W_p, W_q)$  are zero mean, unit variance independent Brownian motion processes, and  $\sigma$  is a scalar. We empirically determined the value of  $\sigma$  to be 2.05 by sweeping its value in the range of  $(0, 2.5)$  so that the noisy CS model fires **in average** 8 spikes per second. The F-I curve of the CS neuron model for different values of  $\sigma$  is shown in Fig A2.

The CS model is based on the classic Hodgkin-Huxley (HH) neuron model [3] and can be expressed in compact form as

$$\frac{d}{dt}\mathbf{y} = \mathbf{f}(\mathbf{y}, I), \quad (\text{A2})$$

where  $\mathbf{y} = [V, n, m, h, p, q]^T$  is a vector of state variables,  $\mathbf{f}$  is a vector function of the same dimension. For simplicity, Eq (A2) omits the subscript notation in Eq (A1). Similarly to the HH neuron model, the state variable  $n$  is a gating variable representing the activation of the potassium channel, while the state variables  $m$  and  $h$  are gating variables representing the activation and deactivation of the sodium channel, respectively. Furthermore, the variables  $p$  and  $q$  are the gating variables representing the activation and deactivation of the “a”-channel. In more detail, Eq (A2) is given by

$$\begin{aligned} \frac{dV}{dt} &= I - I_K - I_{leak} - I_{Na} - I_a \\ \frac{dn}{dt} &= (n_\infty(V) - n)/\tau_n(V) \\ \frac{dm}{dt} &= (m_\infty(V) - m)/\tau_m(V) \\ \frac{dh}{dt} &= (h_\infty(V) - h)/\tau_h(V) \\ \frac{dp}{dt} &= (p_\infty(V) - p)/\tau_p(V) \\ \frac{dq}{dt} &= (q_\infty(V) - q)/\tau_q(V), \end{aligned}$$

where  $V$  denotes the membrane voltage of the neuron model, and  $I$  denotes the external current. Finally,

$$\begin{aligned}
n_{\infty}(V) &= \frac{\alpha_n(V)}{\alpha_n(V) + \beta_n(V)} \\
n_{\tau}(V) &= \frac{2}{0.38(\alpha_n(V) + \beta_n(V))} \\
m_{\infty}(V) &= \frac{\alpha_m(V)}{\alpha_m(V) + \beta_m(V)} \\
m_{\tau}(V) &= \frac{1}{0.38(\alpha_m(V) + \beta_m(V))} \\
h_{\infty}(V) &= \frac{\alpha_h(V)}{\alpha_h(V) + \beta_h(V)} \\
h_{\tau}(V) &= \frac{1}{0.38(\alpha_h(V) + \beta_h(V))} \\
p_{\infty}(V) &= (0.0761 \cdot \frac{\exp((V + 94.22)/31.84)}{1 + \exp((V + 1.17)/28.93)})^{0.3333} \\
p_{\tau}(V) &= 0.3632 + \frac{1.158}{1 + \exp((V + 55.96)/20.12)} \\
q_{\infty}(V) &= (\frac{1}{1 + \exp((V + 53.3)/14.54)})^4 \\
q_{\tau}(V) &= 1.24 + \frac{2.678}{1 + \exp((V + 50)/16.027)}
\end{aligned}$$

and,

$$\begin{aligned}
\alpha_n(V) &= 0.01 \cdot \frac{V + 55}{1 - \exp(-\frac{V+55}{10})} \\
\beta_n(V) &= 0.125 \exp(-\frac{V + 65}{80}) \\
\alpha_m(V) &= 0.1 \cdot \frac{V + 40}{1 - \exp(-\frac{V+40}{10})} \\
\beta_m(V) &= 4 \exp(-\frac{V + 65}{18}) \\
\alpha_h(V) &= 0.7 \exp(-\frac{V + 65}{20}) \\
\beta_h(V) &= \frac{1}{1 + \exp(-\frac{V+35}{10})}.
\end{aligned}$$

Lastly, the current generated by each of the channels is given by,

$$\begin{aligned}
I_K &= 20n^4(V + 72) \\
I_{Na} &= 120hm^3(V - 55) \\
I_{leak} &= 0.3(V + 17) \\
I_a &= 47.7p^3q(V + 75).
\end{aligned}$$

## Two (*acetone*, *Or59b*) datasets.

Each of the two datasets contains the PSTHs obtained from the response of OSNs expressing *Or59b* to acetone step waveforms with different concentration amplitudes.

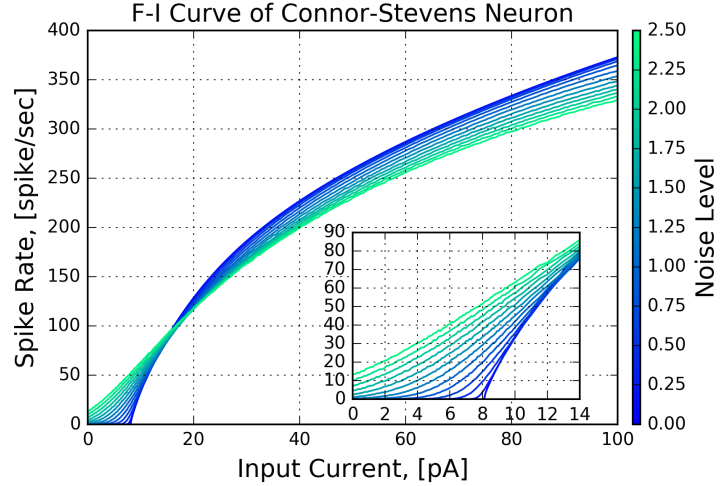

**Fig A2. Characterization of the Connor-Stevens neuron model.** The F-I curves of the model are color-coded for different noise levels ( $\sigma$  in Eq (A1)).

The peak and steady state spike rate as a function of concentration amplitude for both datasets are given in Fig A3A. The acetone step waveforms and the corresponding PSTHs of *Or59b* OSN for the two datasets are shown in Fig A3B-C.

The two datasets are part of a repository of electrophysiology recording data for the olfactory system of the fruit fly. The details of the electrophysiology recordings setup and the odorant delivery system are given in [4] and [5]. The first dataset is made public here, while the second dataset was previously published in [5]. The PSTH of the first dataset was computed using a 100 ms bin size and shifted by 25 ms between consecutive bins.

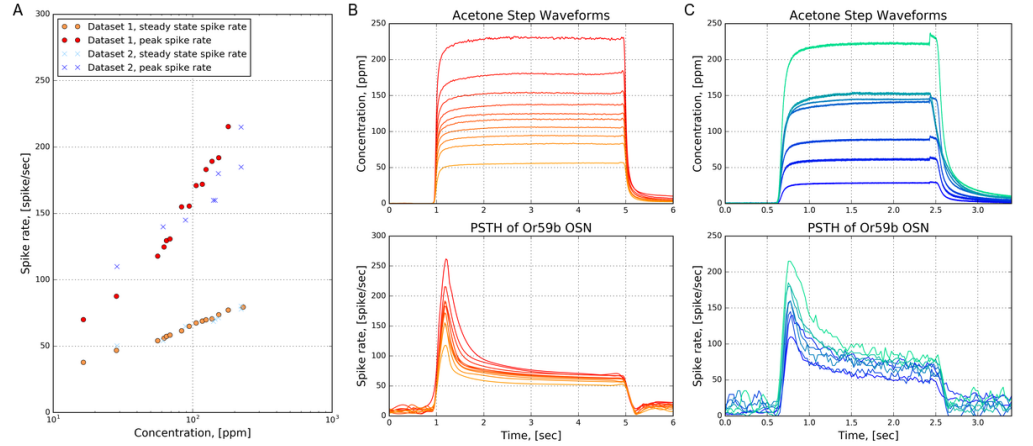

**Fig A3. Two datasets of PSTHs of *Or59b*.** (A) The peak and steady state spike rate as a function of concentration amplitude. (B) Dataset 1. (top) acetone waveforms. (bottom) PSTHs of *Or59b* OSNs. (C) Dataset 2. (top) acetone waveforms. (bottom) PSTHs of *Or59b* OSNs.

The AMP LPU in response to a staircase concentration waveform.

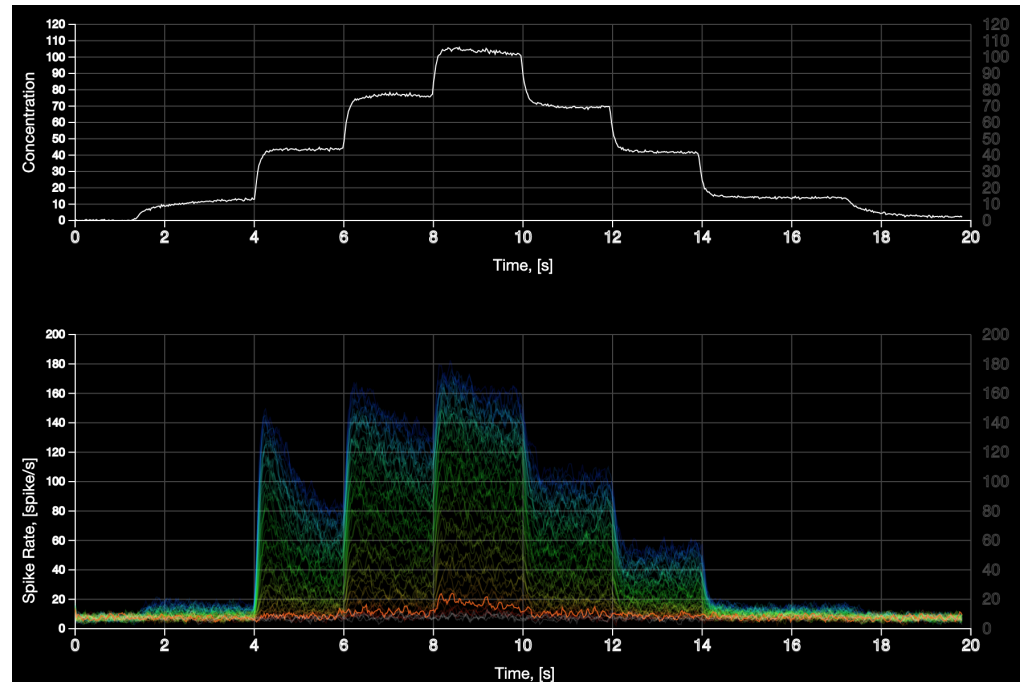

**Fig A4. The 2D preview of the animation in S1 Video.** (top) The staircase odorant waveform. (bottom) The PSTH of 50 receptor types, each of which is labeled with a unique color code. The orange one is highlighted.

## References

1. Connor J, Stevens C. Prediction of repetitive firing behaviour from voltage clamp data on an isolated neurone soma. *The Journal of Physiology*. 1971;213(1):31–53.
2. Gabbiani F, Cox SJ. *Mathematics for neuroscientists*. Academic Press; 2010.
3. Hodgkin AL, Huxley AF. A quantitative description of membrane current and its application to conduction and excitation in nerve. *The Journal of physiology*. 1952;117(4):500–544.
4. Kim AJ, Lazar AA, Slutskiy YB. System identification of *Drosophila* olfactory sensory neurons. *Journal of computational neuroscience*. 2011;30(1):143–161.
5. Kim AJ, Lazar AA, Slutskiy YB. Projection neurons in *Drosophila* antennal lobes signal the acceleration of odor concentrations. *Elife*. 2015;4:e06651.
